# Supplementary material for: Exploration of the Combination of PLK1 Inhibition with Immunotherapy in Cancer Treatment
Source: J Oncol. 2018 Dec 2;2018:3979527. doi: 10.1155/2018/3979527 (PMC6304487; doi:10.1155/2018/3979527)
Supplement: Supplementary Materials — Table S1: the gene signatures for the 6 immune cell types and functions analyzed. Table S2: primer sequences used for qPCR analysis. Table S3: correlations between the PLK1 expression levels and the cell cycle activity in 33 TCGA cancer types. Table S4: correlations between the CTA enrichment levels and the cell cycle activity in 33 TCGA cancer types. Table S5: the correlations of PLK1 expression with immune scores. Table S6: the multiple linear regression analysis of the correlations between PLK1 expression and the immune signature by adding the covariate “age”. [file 3979527.f1.xlsx]

## Sheet: Table S1
Table S1. The gene signatures for the 6 immune cell types and functions analyzed
B cell [1]	NK cell [1]	TILs [2]	HLA	Treg cell [3]	CTA [4]
BACH2	KLRC1	ITM2C	HLA-E	IL12RB2	CEP55
BANK1	KLRF1	CD38	HLA-DPB2	TMPRSS6	NUF2
BLK		C1orf38	HLA-C	CTSC	KIF2C
BTLA		GLYR1	HLA-J	LAPTM4B	OIP5
CD79A		ICOS	HLA-DQB1	TFRC	PBK
CD79B		F5	HLA-DQB2	RNF145	TTK
FCRL1		TIGIT	HLA-DQA2	NETO2	FANCA
FCRL3		KLRD1	HLA-DQA1	ADAT2	CASC5
HVCN1		IRF4	HLA-A	CHST2	ATAD2
RALGPS2		PRKCQ	HLA-DMA	CTLA4	CCDC36
		FCRL5	HLA-DOB	NFE2L3	PLAC1
		SIRPG	HLA-DRB1	LIMA1	ODF2
		LPXN	HLA-H	IL1R2	PIWIL2
		IL2RG	HLA-B	ICOS	KDM5B
		CCL5	HLA-DRB5	HSDL2	ACTL8
		LCK	HLA-DOA	HTATIP2	RGS22
		TRAF3IP3	HLA-DPB1	FKBP1A	SYCE1
		CD86	HLA-DRA	TIGIT	KIF20B
		MAL	HLA-DRB6	CCR8	TDRD6
		LILRB1	HLA-L	LTA	SPAG4
		DOK2	HLA-F	SLC35F2	PRAME
		CD6	HLA-G	IL21R	SPAG1
		PAG1	HLA-DMB	AHCYL1	TMEFF2
		LAX1	HLA-DPA1	SOCS2	TSGA10
		PLEK		ETV7	GPATCH2
		PIK3CD		BCL2L1	PRSS50
		SLAMF1		RRAGB	SPAG8
		XCL1		ACSL4	TPPP2
		GPR171		CHRNA6	ARMC3
		XCL2		BATF	TULP2
		TBX21		LAX1	SPAG6
		CD2		ADPRH	DMRT1
		CD53		TNFRSF4	GPAT2
		KLHL6		ANKRD10	TMEFF1
		SLAMF6		CD274	RQCD1
		CD40		CASP1	SPEF2
		SIT1		LY75	DCAF12
		TNFRSF4		NPTN	CSAG1
		CD79A		SSTR3	ZNF165
		CD247		GRSF1	DDX43
		LCP2		CSF2RB	HORMAD1
		CD3D		TMEM184C	TAF7L
		CD27		NDFIP2	TEKT5
		SH2D1A		ZBTB38	COX6B2
		FYB		ERI1	AKAP3
		ARHGAP30		TRAF3	MAGEA6
		ACAP1		NAB1	CEP290
		CST7		HS3ST3B1	MAGEA3
		CD3G		LAYN	CXorf61
		IL2RB		JAK1	CSAG2
		CD3E		VDR	SPAG9
		FCRL3		LEPROT	MAGEA12
		CORO1A		GCNT1	CALR3
		ITK		PTPRJ	SPANXN3
		TCL1A		IKZF2	CTCFL
		CYBB		CSF1	ROPN1
		CSF2RB		ENTPD1	SPAG17
		IKZF1		TNFRSF18	MAGEA2
		NCF4		METTL7A	MAGEA1
		DOCK2		KSR1	DKKL1
		CCR2		SSH1	CABYR
		PTPRC		CADM1	HORMAD2
		PLAC8		IL1R1	MAGEA4
		NCKAP1L		ACP5	LUZP4
		IL7R		CHST7	DSCR8
		SEPT6		THADA	MAGEC1
		CD28		CD177	TSSK6
		STAT4		NFAT5	MAGEC2
		CD8A		ZNF282	LDHC
		LY9		MAGEH1	PRSS55
		CD48			CAGE1
		HCST			RBM46
		PTPRCAP			PIWIL1
		SASH3			CCDC62
		ARHGAP25			XAGE3
		LAT			MAGEA11
		TRAT1			POTEE
		IL10RA			MAEL
		PAX5			ADAM29
		CCR7			MAGEB1
		DOCK11			SPANXB2
		PARVG			BAGE2
		SPNS1			MAGEA9B
		CD52			TEX15
		HCLS1			PAGE2B
		ARHGAP9			MAGEA10
		GIMAP6			MAGEB6
		PRKCB			ACRBP
		MS4A1			SSX2
		GPR18			CT45A1
		TBC1D10C			SSX1
		GVIN1			CT45A5
		P2RY8			MAGEC3
		EVI2B			MAGEA5
		VAMP5			TEX101
		KLRK1			PAGE2
		SELL			POTEG
		MPEG1			GAGE4
		MS4A6A			FTHL17
		ARHGAP15			CTAGE5
		MFNG			SLCO6A1
		GZMK			FATE1
		SELPLG			PAGE5
		TARP			CCDC83
		GIMAP7			KIAA0100
		FAM65B			FMR1NB
		INPP5D			CTAG1B
		ITGA4			XAGE2
		MGC29506			CXorf48
		GPSM3			CCDC110
		STK10			CT45A3
		CLEC2D			GAGE12D
		IL16			POTEC
		NLRC3			DPPA2
		GIMAP5			CCDC33
		GIMAP4			PRSS54
		IFFO1			RNF17
		CFH			IGSF11
		PVRIG			DDX53
		CFHR1			HEMGN
					PTPN20A
					PASD1
					GAGE12J
					CTAG2
					AKAP4
					CT45A2
					MAGEB3
					SPANXC
					GAGE2A
					BAGE
					SPA17
					ANKRD45
					CT45A4
					SSX4
					NXF2
					LEMD1
					LYPD6B
					ZNF645
					ODF4
					SSX3
					SPANXE
					CT45A6
					C21orf99
					PAGE1
					SPACA3
					GAGE1
					DNAJB8
					GAGE8
					FAM133A
					SSX7
					FBXO39
					CPXCR1
					SPINLW1
					POTEB
					TFDP3
					TEX14
					SPANXA2
					FAM46D
					CT47B1
					HSPB9
					IMP3
					SSX9P
					GAGE13
					SPANXN5
					TMPRSS12
					SEMG1
					SSX6
					TMEM108
					SPATA19
					VENTXP1
					ODF3
					SPANXN1
					SAGE1
					MAGEB2
					C15orf60
					POTEH
					CTNNA2
					IL13RA2
					NR6A1
					NLRP4
					MAGEA8
					ELOVL4
					PAGE3
					SPO11
					SPANXN2
					CT47A1
					ARX
					PRM2
					CTAGE1
					GAGE12F
					SYCP1
					MORC1
					NXF2B
					XAGE5
					PRM1
					XAGE1D
					CT47A11
					CT47A2
					CT47A6
					CT47A7
					OTOA
					THEG
					MAGEB4
					NOL4
					LY6K
					TDRD1
					ADAM2
					LIPI
					BRDT
					ODF1
					POTEA
					POTED
					PAGE4
					TPTE
					CCNA1
					CRISP2
					SSX5
					CT47A10
					CT47A9
					SPANXN4
					TSPY1
					TSPY2
					TSPY3
References
[1] MS Rooney, SA Shukla, CJ Wu, G Getz, N Hacohen. Molecular and genetic properties of tumors associated with local immune cytolytic activity. Cell, 160 (2015), pp. 48-61
[2] MPG Massink, IE Kooi, JWM Martens, Q Waisfisz, H Meijers-Heijboer. Genomic profiling of CHEK2*1100delC-mutated breast carcinomas. BMC Cancer, 15 (2015), p. 877
[3] M De Simone, A Arrigoni, G Rossetti, P Gruarin, V Ranzani, C Politano, RJP Bonnal, E Provasi, MLSarnicola, I Panzeri, et al. Transcriptional Landscape of Human Tissue Lymphocytes Unveils Uniqueness of Tumor-Infiltrating T Regulatory Cells. Immunity, 45 (2016), pp. 1135-1147
[4] LG Almeida, NJ Sakabe, AR deOliveira, MCC Silva, AS Mundstein, T Cohen, Y-T Chen, R Chua, SGurung, S Gnjatic, et al. CTdatabase: a knowledge-base of high-throughput and curated data on cancer-testis antigens. Nucleic Acids Res, 37 (2009), pp. D816-819

## Sheet: Table S2
Table S2. Primer sequences used for qPCR analysis
Primer name	Sequence (5' to 3')	Number of bases
HLA-A(H)F	GCAGTTGAGAGCCTACCTGG	20
HLA-A(H) R	GGGTCATATGTGTCTTGGGG	20
HLA-B(H) F	TCCGCAGATACCTGGAGAAC	20
HLA-B(H) R	CTCATGGTCAGAGATGGGGT	20
HLA-C(H) F	TCCGCAGATACCTGGAGAAC	20
HLA-C(H) R	GTGGCCTCATGGTCAGAGAG	20
B2M(H) F	TAGCTGTGCTCGCGCTACT	19
B2M(H) R	TCTCTGCTGGATGACGTGAG	20
TAP1(H) F	TCCGGAAACCGTGTGTACTT	20
TAP1(H) R	TCAGGGCTTTCGTACAGGAG	20
beta actin(H) F	CATGTACGTTGCTATCCAGGC	21
beta actin(H) R	CTCCTTAATGTCACGCACGAT	21

## Sheet: Table S3
Table S3. Spearman's rank correlation between the PLK1 expression levels and the cell cycle activity in 33 TCGA cancer types
Cancer type	Correlation coefficient	P-value
ACC	0.906086	< 2.2E-16
BLCA	0.825345	< 2.2E-16
BRCA	0.893544	< 2.2E-16
CESC	0.531284	< 2.2E-16
CHOL	0.789447	2.88926e-07
COAD	0.741795	< 2.2E-16
DLBC	0.785714	< 2.2E-16
ESCA	0.706319	< 2.2E-16
GBM	0.820144	< 2.2E-16
HNSC	0.639952	< 2.2E-16
KICH	0.653481	4.8424e-09
KIRC	0.592846	< 2.2E-16
KIRP	0.56642	< 2.2E-16
LAML	0.688821	< 2.2E-16
LGG	0.792635	< 2.2E-16
LIHC	0.873033	< 2.2E-16
LUAD	0.885609	< 2.2E-16
LUSC	0.662957	< 2.2E-16
MESO	0.885106	< 2.2E-16
OV	0.760514	< 2.2E-16
PAAD	0.845015	< 2.2E-16
PCPG	0.409645	1.06254e-08
PRAD	0.696485	< 2.2E-16
READ	0.79846	< 2.2E-16
SARC	0.836464	< 2.2E-16
SKCM	0.627887	< 2.2E-16
STAD	0.740579	< 2.2E-16
TGCT	0.784913	< 2.2E-16
THCA	0.369383	< 2.2E-16
THYM	0.911938	< 2.2E-16
UCEC	0.727437	< 2.2E-16
UCS	0.488657	0.000139744
UVM	0.555391	1.53179e-07

## Sheet: Table S4
Table S4. Spearman's rank correlation between the CTA enrichment levels and the cell cycle activity in 33 TCGA cancer types
Cancer_type	Correlation coefficient	P-value	FDR
ACC	0.668281	< 2.2E-16	< 2.2E-16
BLCA	0.416295	< 2.2E-16	< 2.2E-16
COAD	0.527429	< 2.2E-16	< 2.2E-16
ESCA	0.503573	< 2.2E-16	< 2.2E-16
GBM	0.599756	< 2.2E-16	< 2.2E-16
KICH	0.697025	< 2.2E-16	< 2.2E-16
KIRP	0.457021	< 2.2E-16	< 2.2E-16
LGG	0.540644	< 2.2E-16	< 2.2E-16
LIHC	0.498	< 2.2E-16	< 2.2E-16
OV	0.466093	< 2.2E-16	< 2.2E-16
PAAD	0.526709	< 2.2E-16	< 2.2E-16
SARC	0.560276	< 2.2E-16	< 2.2E-16
STAD	0.621687	< 2.2E-16	< 2.2E-16
UCEC	0.418934	< 2.2E-16	< 2.2E-16
BRCA	0.71321	< 2.2E-16	< 2.2E-16
LUAD	0.642765	< 2.2E-16	< 2.2E-16
KIRC	0.440272	< 2.2E-16	< 2.2E-16
PRAD	0.450704	< 2.2E-16	< 2.2E-16
LUSC	0.317511	4.50074e-13	7.81707e-13
LAML	0.464275	1.79707e-10	2.96517e-10
PCPG	0.429138	1.76334e-09	2.64501e-09
MESO	0.585496	4.27798e-09	6.13798e-09
THYM	0.497396	1.18813e-08	1.63368e-08
READ	0.537906	3.21689e-08	4.24629e-08
SKCM	0.23858	1.55884e-07	1.97853e-07
HNSC	0.188414	1.52206e-05	1.8603e-05
UVM	0.4188	0.000127316	0.000150051
CESC	0.186721	0.00104997	0.00119479
UCS	0.3972	0.00238464	0.0026231
CHOL	0.427284	0.00988281	0.0105204
THCA	-0.271621	4.64995e-10	7.30706e-10
DLBC	0.192683	0.188928	0.194832
TGCT	0.078472	0.329814	0.329814

## Sheet: Table S5
Table S5. The correlations of PLK1 expression with immune scores
Cancer type	ALL	Gender		Age		Stage		Grade
		Male	Female	Young (age<60)	Old (age≥60)	Early	Late	Low	High
						stage	stage	grade	grade
ACC	-0.26	-0.3	-0.27	-0.29 *	-0.16	0.16	-0.35 *	NA	NA
BLCA	0.08	0.08	0.13	0.06	0.08	-0.01	0.24 *	-0.09	0.05
BRCA	0.05	-0.31	0.06	0.01	0.09	0	0.07 *	-0.16 *	-0.09
CESC	-0.1	NA	-0.11	-0.09	-0.18	0.1	-0.16 *	-0.09	-0.13
CHOL	-0.17	-0.22	-0.08	0.09	-0.37	0.12	-0.17	NA	NA
COAD	-0.06	-0.01	-0.09	-0.13	0	-0.1	0	NA	NA
DLBC	-0.32	-0.31	-0.35	-0.38	-0.27	-0.1	-0.45 *	NA	NA
ESCA	-0.24 **	-0.24 **	-0.09	-0.07	-0.26*	-0.24	-0.22 *	-0.24 *	-0.21
GBM	-0.38 ***	-0.4***	-0.35 *	-0.37 **	-0.4 **	NA	NA	NA	NA
HNSC	-0.08	-0.15	0.15	-0.09	-0.07	-0.06	-0.12	-0.15 *	0.06
KICH	-0.21	-0.22	-0.17	-0.2	-0.26	0.14	-0.33 *	NA	NA
KIRC	0.4 ***	0.39 ***	0.38 ***	0.42 ***	0.38 ***	0.32 ***	0.4	0.4 ***	0.34 ***
KIRP	-0.01	-0.06	0.1	0	0.01	0.01	0.05	NA	NA
LAML	0.03	0.05	0.01	0.11	-0.06	NA	NA	NA	NA
LGG	0.11 *	0.1	0.13	0.15 **	-0.12	NA	NA	0.1	-0.01
LIHC	0.05	0.09	0.01	-0.05	0.16	0.13	0.06	0.07	0.05
LUAD	-0.13 **	-0.07	-0.17 *	-0.16	-0.11	0	-0.12 *	NA	NA
LUSC	-0.26 ***	-0.23 ***	-0.32 **	-0.09	-0.29 ***	-0.29 *	-0.26 ***	NA	NA
MESO	0.05	-0.03	0.43	-0.12	0.13	0.13	-0.12	NA	NA
OV	-0.05	NA	-0.07	-0.11	-0.02	-0.06	-0.17	-0.17	-0.06
PAAD	-0.23 **	-0.16	-0.28 *	-0.22	-0.25 *	-0.36	-0.25 **	-0.23 *	-0.18
PCPG	-0.04	-0.13	-0.01	-0.11	0.01	NA	NA	NA	NA
PRAD	0.06	0.06	NA	0.08	0.01	NA	NA	NA	NA
READ	-0.13	-0.05	-0.35 *	-0.08	-0.22	0.13	-0.35 *	NA	NA
SARC	-0.04	-0.01	-0.05	-0.08	-0.08	NA	NA	NA	NA
SKCM	-0.05	-0.07	-0.02	-0.05	-0.04	-0.02	-0.15 *	NA	NA
STAD	-0.25 ***	-0.25 ***	-0.26 *	-0.31 **	-0.23 ***	-0.29***	-0.23 **	-0.17 *	-0.23 **
TGCT	-0.42 ***	-0.34 ***	NA	-0.33 **	0.47 ***	0.02	-0.37 ***	NA	NA
THCA	0.47 ***	0.37 ***	0.51 ***	0.48 ***	NA	0.37 ***	0.52 ***	NA	NA
THYM	0.42 ***	0.48 ***	0.38 *	0.4 *	0.46 **	0.65 *	0.34	NA	NA
UCEC	-0.15 **	NA	-0.15 *	-0.23 *	-0.11	-0.11	-0.16 *	-0.15 *	-0.11
UCS	-0.15	NA	-0.15	0.09	-0.21	-0.53 *	0.21	NA	NA
UVM	-0.01	0.06	-0.12	-0.05	0.02	-0.1	-0.01	NA	NA
* 0.01≤ FDR <0.1 ,** 0.001≤ FDR <0.01 , ***FDR <0.001
NA: no data available

## Sheet: Table S6
Table S6. The multiple linear regression analysis of the correlations between PLK1 expression and the immune signature by adding the covariate "age"
Immune score (ACC)	Estimate	P-value
(Intercept)	299.746	0.338628			Adjusted R-squared=0.153
Log2 (PLK1 expression level)	-130.921	0.000244	***
age	0.8552	0.825425
Immune score (BLCA)	Estimate	P-value
(Intercept)	-645.844	0.213			Adjusted R-squared=1.61E-04
Log2 (PLK1 expression level)	61.844	0.163
age	1.137	0.796
Immune score (BRCA)	Estimate	P-value
(Intercept)	-158.089	0.4199			Adjusted R-squared=0.002
Log2 (PLK1 expression level)	37.154	0.0465	*
age	-0.125	0.9445
Immune score (CESC)	Estimate	P-value
(Intercept)	1869.07	0.044	*		Adjusted R-squared=0.005
Log2 (PLK1 expression level)	-157.334	0.0715	.
age	1.638	0.6326
Immune score (CHOL)	Estimate	P-value
(Intercept)	3794.49	0.01846	*		Adjusted R-squared=0.183
Log2 (PLK1 expression level)	-507.212	0.00732	**
age	5.354	0.56421
Immune score (COAD)	Estimate	P-value
(Intercept)	180.799	0.8			Adjusted R-squared=7.60E-04
Log2 (PLK1 expression level)	-25.131	0.707
age	-0.714	0.798
Immune score (DLBC)	Estimate	P-value
(Intercept)	5867.88	1.56e-06	***		Adjusted R-squared=0.109
Log2 (PLK1 expression level)	-257.493	0.00955	**
age	0.09183	0.98239
Immune score (ESCA)	Estimate	P-value
(Intercept)	1134.26	0.12325			Adjusted R-squared=0.06756
Log2 (PLK1 expression level)	-168.885	0.00738	**
age	9.195	0.02344	*
Immune score (GBM)	Estimate	P-value
(Intercept)	2698.31	1.89e-05	***		Adjusted R-squared=0.118
Log2 (PLK1 expression level)	-290.052	6.82e-06	***
age	3.021	0.48
Immune score (HNSC)	Estimate	P-value
(Intercept)	1319.24	0.0262	*		Adjusted R-squared=0.006
Log2 (PLK1 expression level)	-104.184	0.0539	.
age	3.214	0.2772
Immune score (KICH)	Estimate	P-value
(Intercept)	-183.403	0.6043			Adjusted R-squared=0.021
Log2 (PLK1 expression level)	-85.091	0.0796	.
age	1.737	0.7063
Immune score (KIRC)	Estimate	P-value
(Intercept)	-935.872	0.000121	***		Adjusted R-squared=0.167
Log2 (PLK1 expression level)	300.536	<2E-16	***
age	2.493	0.299214
Immune score (KIRP)	Estimate	P-value
(Intercept)	281.019	0.483			Adjusted R-squared=0.002
Log2 (PLK1 expression level)	-7.902	0.873
age	-2.576	0.503
Immune score (LAML)	Estimate	P-value
(Intercept)	2031.36	9.36e-08	***		Adjusted R-squared=0.055
Log2 (PLK1 expression level)	9.589	0.801077
age	9.058	0.000736	***
Immune score (LGG)	Estimate	P-value
(Intercept)	-1175.47	1.9e-07	***		Adjusted R-squared=0.013
Log2 (PLK1 expression level)	84.1832	0.0039	**
age	0.5631	0.8101
Immune score (LIHC)	Estimate	P-value
(Intercept)	-454.851	0.0365	*		Adjusted R-squared=0.006
Log2 (PLK1 expression level)	26.429	0.1792
age	3.889	0.1067
Immune score (LUAD)	Estimate	P-value
(Intercept)	1378.23	0.000152	***		Adjusted R-squared=0.009
Log2 (PLK1 expression level)	-67.705	0.01932	*
age	2.596	0.481813
Immune score (LUSC)	Estimate	P-value
(Intercept)	4091.4	2.71e-08	***		Adjusted R-squared=0.072
Log2 (PLK1 expression level)	-377.173	1.86e-09	***
age	1.791	0.692
Immune score (MESO)	Estimate	P-value
(Intercept)	50.751	0.945			Adjusted R-squared=0.020
Log2 (PLK1 expression level)	4.86	0.941
age	10.178	0.209
Immune score (OV)	Estimate	P-value
(Intercept)	1243.02	0.0822	.		Adjusted R-squared=0.006
Log2 (PLK1 expression level)	-108.903	0.0907	.
age	-4.049	0.3693
Immune score (PAAD)	Estimate	P-value
(Intercept)	2894.23	5.72e-07	***		Adjusted R-squared=0.099
Log2 (PLK1 expression level)	-264.969	1.31e-05	***
age	0.09636	0.984
Immune score (PCPG)	Estimate	P-value
(Intercept)	-320.42	0.168			Adjusted R-squared=0.010
Log2 (PLK1 expression level)	-44.707	0.249
age	-3.559	0.115
Immune score (PRAD)	Estimate	P-value
(Intercept)	-1226.87	8.5e-09	***		Adjusted R-squared=0.009
Log2 (PLK1 expression level)	2.279	0.9086
age	7.616	0.0139	*
Immune score (READ)	Estimate	P-value
(Intercept)	1331.24	0.145			Adjusted R-squared=0.009
Log2 (PLK1 expression level)	-131.44	0.105
age	-2.863	0.524	*
Immune score (SARC)	Estimate	P-value
(Intercept)	408.39	0.4777			Adjusted R-squared=0.010
Log2 (PLK1 expression level)	-53.49	0.3424
age	10.1	0.0453	*
Immune score (SKCM)	Estimate	P-value
(Intercept)	1759.79	0.00343	**		Adjusted R-squared=0.01098
Log2 (PLK1 expression level)	-89.045	0.13872
age	-7.133	0.03708	*
Immune score (STAD)	Estimate	P-value
(Intercept)	3460.07	3.67e-09	***		Adjusted R-squared=0.068
Log2 (PLK1 expression level)	-284.488	5.74e-08	***
age	1.037	0.793
Immune score (TGCT)	Estimate	P-value
(Intercept)	6337.45	1.55e-06	***		Adjusted R-squared=0.128
Log2 (PLK1 expression level)	-505.627	1.3e-05	***
age	-10.806	0.277
Immune score (THCA)	Estimate	P-value
(Intercept)	-2016.21	<2E-16	***		Adjusted R-squared=0.184
Log2 (PLK1 expression level)	349.687	<2E-16	***
age	0.5504	0.76
Immune score (THYM)	Estimate	P-value
(Intercept)	1127.13	0.00745	**		Adjusted R-squared=0.102
Log2 (PLK1 expression level)	101.084	0.00277	**
age	-4.973	0.15307
Immune score (UCEC)	Estimate	P-value
(Intercept)	699.072	0.0798	.		Adjusted R-squared=0.011
Log2 (PLK1 expression level)	-77.259	0.0365	*
age	-3.523	0.2958
Immune score (UCS)	Estimate	P-value
(Intercept)	-514.626	0.755			Adjusted R-squared=0.036
Log2 (PLK1 expression level)	-99.071	0.478
age	9.25	0.304
Immune score (UVM)	Estimate	P-value
Intercept)	-361.024	0.522			Adjusted R-squared=0.006
Log2 (PLK1 expression level)	-21.722	0.728
age	-2.898	0.545
. 0.05≤ P-value <0.1 ,* 0.01≤ P-value <0.05 ,** 0.001≤ P-value <0.01 , ***P-value <0.001
